# Supplementary material for: A Genetic Study of Nif-Associated Genes in a Hyperthermophilic Methanogen
Source: PubMed Central journal article supplement (PMC8809328; doi:10.1128/spectrum.02093-21), 2022-02-02

## Supplemental Material

### Supplemental figures

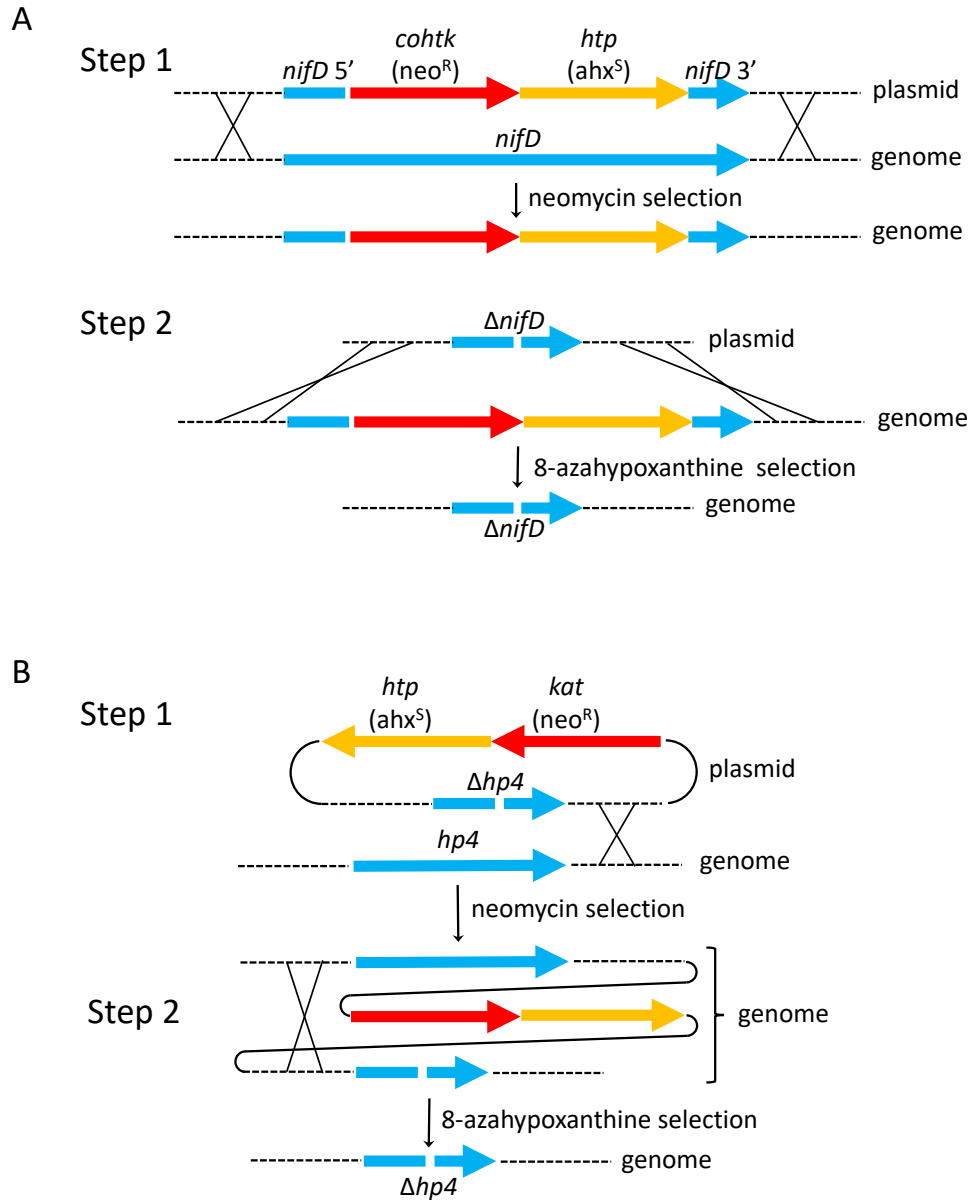

**Fig. S1. Construction of  $\Delta nifD$  (A) and  $\Delta hp4$  (B) mutants.** Dashed lines represent flanking sequences. Solid lines represent vector sequences. “X” shapes represent homologous recombination.  $ahx^S$ , 8-azahypoxanthine-sensitive. In (A), two transformations are done, and two double homologous recombinations occur. In (B), one transformation is done, and a homologous recombination event occurs resulting in a merodiploid. In step 2 a second recombination event occurs. Each step depicts one of two possible recombination events. The procedure yields either the mutant allele as shown, or the wild type allele, depending on which recombination events occur. The mutant allele is identified by screening.

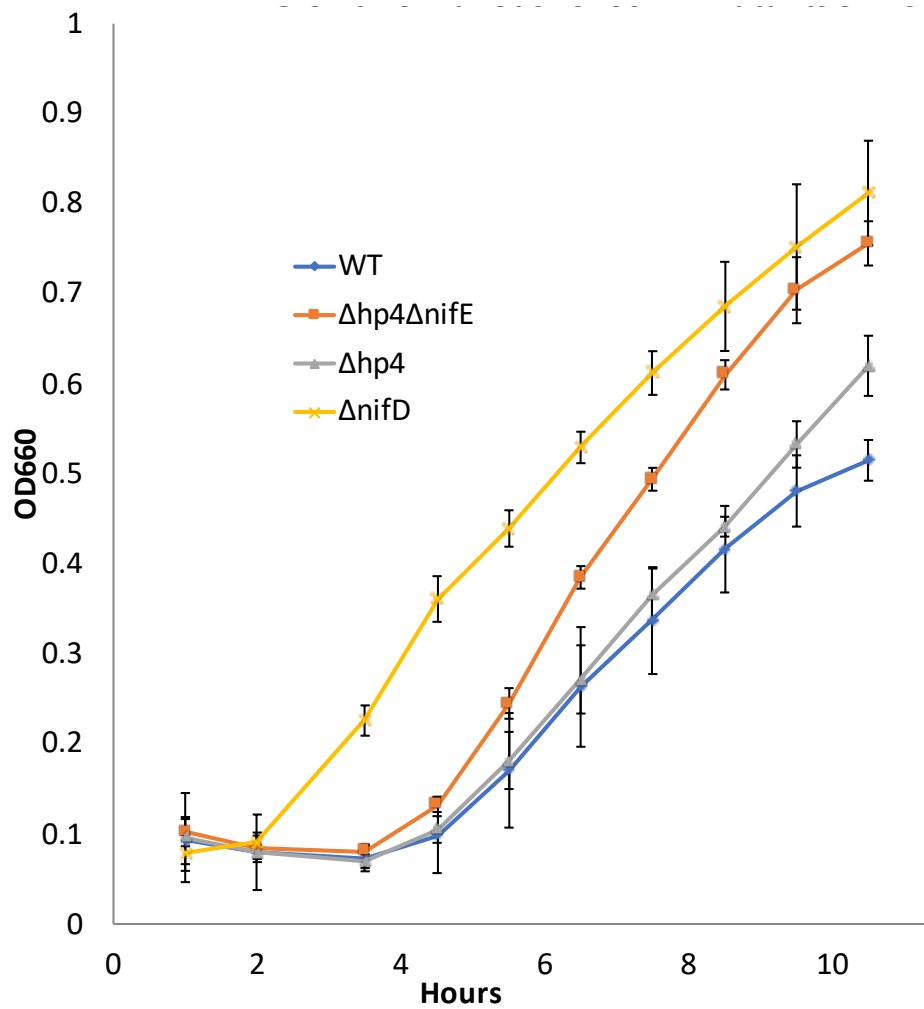

Fig. S2. Growth of various FS406 *nif* mutants on  $\text{NH}_4^+$  at 85°C. Averages of three cultures and standard deviations are shown.

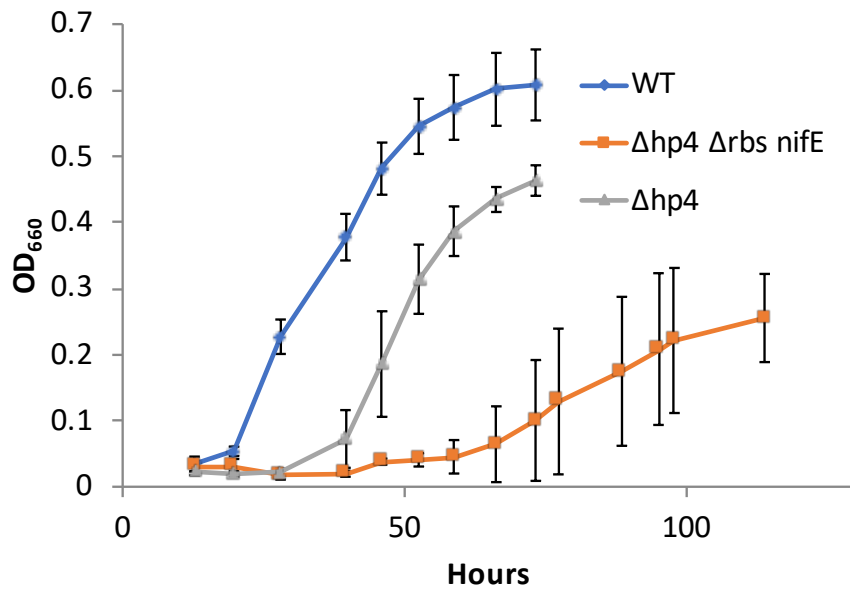

Fig. S3. Diazotrophic growth of  $\Delta hp4 \Delta rbs nifE$  and  $\Delta hp4$  mutants inoculated with diazotrophically grown cultures. Growth temperature was 75°C. Averages of three cultures and standard deviations are shown.

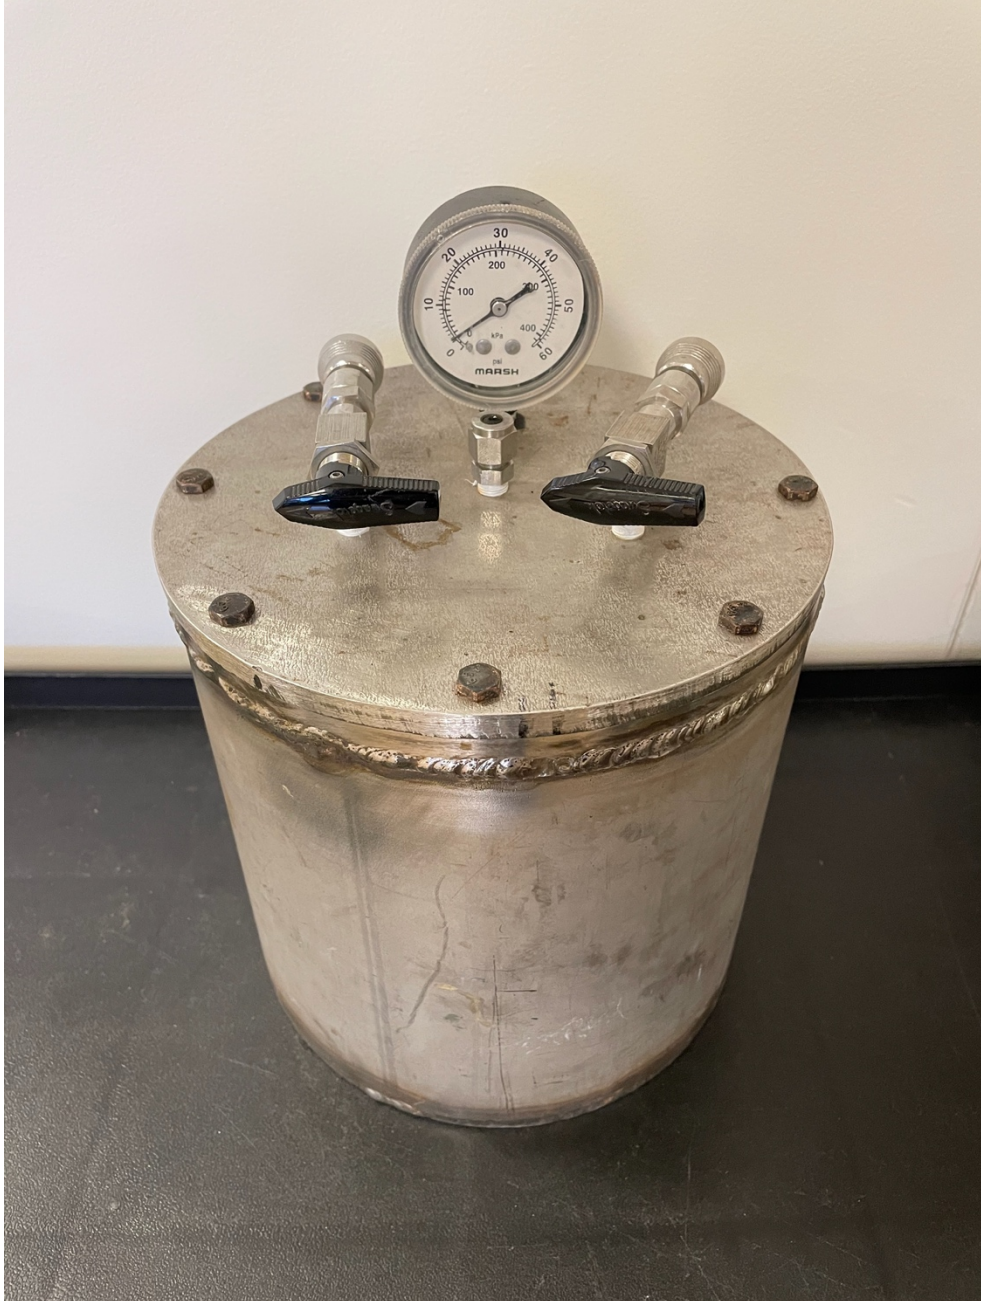

Fig. S4. Steel incubation vessel for anaerobic incubation of agar plates

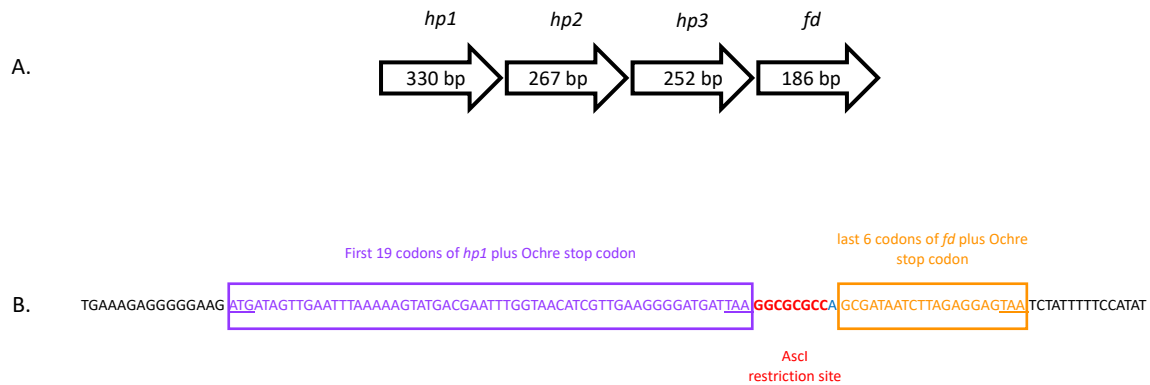

Fig. S5. (A) Wildtype *hp1* to *fd* gene cluster of FS406. Numbers within arrows (*hp1*, *hp2*, *hp3*, *fd*) represent total number of nucleotides. (B)  $\Delta$ *hp1* to *fd* region of plasmid pL  $\Delta$ *hp1*ferro . Letters in black are the upstream sequences of *hp1* and downstream sequences of *fd* respectively. Letters in purple represent in-frame deletion of *hp1* with 18 codons between the start and stop codons. Red letters represent the *AscI* restriction site. Blue letter represents nucleotide added during cloning to allow the *AscI* site (plus the A nucleotide) to code for the amino acids, Gly, Ala, and Pro. Orange letters represent the last 7 codons of the *fd* gene. Start and Stop codons are underlined.

**Table S1. PCR primers**

| <u>Primer name</u>   | <u>Sequence</u>                                                                                                                                     | <u>Product</u>                                 |
|----------------------|-----------------------------------------------------------------------------------------------------------------------------------------------------|------------------------------------------------|
| TLP318<br>TLP368     | AAA CTA GTA AAT AAA GAA ATA TTT TTA TAG GAC (SpeI)<br>ATT TTT <u>CAT ATG</u> TAC TCC TCC CTA CCA TTT TG (NdeI)                                      | <i>M. jannaschii rpoH</i><br>promoter (MJ1039) |
| TLP327<br>TLP321     | GTG AGG <u>CAT ATG</u> AAC GGA CCA ATA ATA ATG ACT AGA G (NdeI)<br>AAT <u>CTA GAT</u> CAA AAT GGT ATG CGT TTT GAC (XbaI)                            | <i>kat</i> gene from pMK18                     |
| TLP 314<br>TLP 315   | AAA CTA GTA CAA AAA CTT AAA TTC TGA C (SpeI)<br>AAA <u>TGC ATT</u> CAC CTC ATT TTA CAT AAG AC (NsiI)                                                | <i>M. jannaschii mtrE</i><br>promoter (MJ0847) |
| TLP316<br>TLP367     | AAA <u>TGC ATG</u> TTT ATA AAG TGC TAT AGT G (NsiI)<br>AAT <u>CTA GAT</u> TAA TCC CTT AAA ATA ACA AC (XbaI)                                         | FS406 <i>hpt</i> gene<br>(MFS40622_0597)       |
| TLP386               | CGG TAT <u>GAT ATC</u> AAA TAA AGA AATY ATT TTT ATA GGA C (EcoRV)                                                                                   | <i>M.jannaschii rpoH</i><br>promoter (MJ1039)  |
| TLP 373<br>TLP 374   | TCG TGC <u>CAG CTG</u> CAT TAA TGA ATC GGC C (PvuII)<br>TCT GCA <u>GAT ATC</u> CAT CAC ACT GGC GGC C (EcoRV)                                        | Ori region from<br>pCruptneo III               |
| TLP 375<br>TLP 376   | TAA <u>AAG CTT</u> GGG GAA ATG TGC GCG GAA CC (HindIII)<br>TTA ATG <u>CAG CTG</u> TTA ATC AGT GAG GCA CCT ATC TC (PvuII)                            | Amp region from<br>pJAR50CT                    |
| TLP 456<br>TLP 453   | ATA TAT <u>GCG GCC GCG</u> ATG GAT ATC ACA AAA ACT TAA<br>ATT CTG ACA TTG (NotI)<br>ATA TAT <u>ATG CAT</u> CAC CTC ATT TTA CAT AAG AC (NsiI)        | <i>M. jannaschii mtrE</i><br>promoter          |
| TLP 362<br>TLP 455   | AAC <u>TGC AGA</u> TGA ATG GAC CAA TAA TAA TGA CTA G (PstI)<br>ATA TAT <u>CGA TGC</u> TCA AAA TGG TAT GCG TTT TGA C (PvuI)                          | <i>kat</i> gene                                |
| TLP 451:<br>TLP 452  | ATA TAT <u>GTT AAC</u> CTG TTA TTT TTA ATA AAA AAT TTC AGA TAG (HpaI)<br>ATA TAT <u>ATG CAT</u> ACA TAT TGG TTC GAT ATT AGT TAT CGC (Nsi)           | <i>M. jannaschii mcrB</i><br>promoter (MJ0842) |
| TLP 316<br>TLP 387I  | AAA <u>TGC ATG</u> TTT ATA AAG TGC TAT AGT G (NsiI)<br>TCG TGC <u>AAG CTT</u> TTA ATC CCT TAA AAT AAC AAC (HindIII)                                 | FS406 <i>hpt</i> gene                          |
| TLP 520<br>TLP 387I  | ATA TAT <u>GCG GCC GCG</u> ATG GAT ATC ATT ATG TTG ATA TTG (NotI)<br>TCG TGC <u>AAG CTT</u> TTA ATC CCT TAA AAT AAC AAC (HindIII)                   | Pmtr:cohtk –<br>Pmcr:hpt                       |
| TLP 518I<br>TLP 519I | ATA TAT <u>AAG CTT</u> GGG GAA ATG TGC GCG GAA CC (HindIII)<br><u>GAT ATC</u> CAT <u>CGC GGC CGC</u> TCG AGC ATG CAT CTA GAG C<br>(EcoRV NotI rev)  | Amp-Ori from<br>pJALv3S1                       |
| TLP 527<br>TLP 528   | CAA GGA TGT CAT TAT AAT TTT CCA TCC TAT CAC CTC ATT TTA<br>CAT AAG AC<br>GCT CAT CAA GAA CTC GGT AGA TAA CTG TTA TTT TTA ATA AAA<br>AAT TTC AGA TAG | pLHI from pLKH                                 |

|            |                                                                              |                                           |
|------------|------------------------------------------------------------------------------|-------------------------------------------|
| TLP 525    | GTC TTA TGT AAA ATG AGG TGA TAG GAT GGA AAA TTA TAA<br>TGA CAT CCT TG        | <i>M. jannaschii</i><br><i>hmgA</i> gene  |
| TLP 526    | CTA TCT GAA ATT TTT TAT TAA AAA TAA CAG TTA TCT ACC<br>GAG TTC TTG ATG AGC   |                                           |
| TLP 533    | ATA TAT <u>GCG GCC GCT</u> CTG ACA GAT TTG GAA TTG TTG<br>AGG AAG AAG (NotI) | Last 500bp of FS406<br><i>nrpR</i> region |
| TLP 534    | ATA TAT <u>TCT AGA</u> AAG GCG CGC CCA CAA TCC ATA GAG<br>GTT TCA CC (XbaI)  |                                           |
| TLP 535    | ATATAT <u>GCGCGCC</u> ATGTTTTAAACTATAAGGAAATAAGTTTCC (Ascl)                  | native FS406 <i>hp4</i>                   |
| TLP 440    | ATA TAT <u>GGC GCG CCT</u> CAT ACT ATC TCC TTC AAT ACC TC (Ascl)             | and promoter region                       |
| Primer 99  | AAA <u>AGC GGC CGC</u> CAG AGT TAG AAT CTT AGG GAA GG (NotI)                 | FS406 <i>Δhpt</i>                         |
| Primer 100 | AAA <u>AGG CGC GCC</u> ACA ATC TTC CAC CTC CAC TAT AGC AC (Ascl)             |                                           |
| Primer 101 | AAA <u>AGG CGC GCC</u> TAA ATA TGG AAA AGC CCT TAA AAT C (Ascl)              |                                           |
| Primer 102 | AAA <u>ATC TAG AAT</u> GAT TTT TGT TGG ATT TAT CTC TC (XbaI)                 |                                           |
| TLP 478    | ATA TAT <u>TCT AGA</u> GGA AAC TTT GGA GAT GGG (XbaI)                        | FS406 <i>ΔnifD</i>                        |
| TLP 479    | ATA TAT <u>GGC GCG CCT</u> TAA GCC GGG ATT ATC TC (Ascl)                     |                                           |
| TLP 480    | ATA TAT <u>GCG GCC GCG</u> AAT TTA AGA AAA AAG ATA TTC C (NotI)              |                                           |
| TLP 503    | ATA TAT <u>AAG CTT</u> GGA ATT ATT GGG AGT TGA GCT TTC (HindIII)             |                                           |
| TLP 484    | ATA TAT <u>TCT AGA</u> GTT GGA ATC TTT GGG GAT CC (XbaI)                     | upstream of <i>hp1</i>                    |
| TLP 485    | ATA TAT <u>GGC GCG CCT</u> TAA TCA TCC CCT TCA AC (Ascl)                     |                                           |
| TLP445-2   | ATA TAT <u>GGC GCG CCA</u> GCG ATA ATC TTA GAG G (Asci)                      | downstream of ferredoxin                  |
| TLP446-2   | TAT ATA <u>AAG CTT</u> CTT TGA CCT TAA CTT C (HindIII)                       |                                           |
| TLP 521    | ATA TAT <u>GGC GCG CCA</u> TAT CAT TAT GTT GAT ATT GTT AAG C (Ascl)          | <i>cohtk-hpt</i> cassette from<br>pLKH    |
| TLP 522    | ATA TAT <u>GGC GCG CCT</u> AAA CAA ATA GGG GTT CCG CGC (Ascl)                |                                           |
| TLP377     | AAT <u>CTA GAC</u> GAG GAG TTA GTT GAG GAA G (XbaI)                          | <i>Δhp4ΔrbsnifE</i> ML103                 |
| TLP378     | AAG <u>GCG CGC CCA</u> TGC TTT CAA CCT CCT GTG TCC (Ascl)                    |                                           |
| TLP379     | AAG <u>GCG CGC CCT</u> GAA TGA AAT AAA AGT CCT TCC (Ascl)                    |                                           |
| TLP380     | AAG <u>CGG CCG CTT</u> AGT CTA AAT AAT GCC TTC ATT GC (NotI)                 |                                           |
| TLP377     | AAT <u>CTA GAC</u> GAG GAG TTA GTT GAG GAA G (XbaI)                          | <i>Δhp4</i> ML104                         |
| TLP378     | AAG <u>GCG CGC CCA</u> TGC TTT CAA CCT CCT GTG TCC (Ascl)                    |                                           |
| TLP449     | ATA TAT <u>GGC GCG CCC</u> TGA GGT ATT GAA GGA GAT AGT<br>ATG AAT G (Ascl)   |                                           |
| TLP380     | AAG <u>CGG CCG CTT</u> AGT CTA AAT AAT GCC TTC ATT GC (NotI)                 |                                           |
| TLP 482    | ATA TAT <u>GGC GCG CCA</u> CAA AAA CTT AAA TTC TG (Ascl)                     | Pmjmr::kat -                              |
| TLP 490    | ATA TCT <u>GCG GCC GCT</u> TAA TCC CTT AAA ATA ACA ACT TTC C (NotI)          | Pmjmc::hpt from<br>pJAL v3S1              |

## Strain list

| <u>Strain</u> | Description                        |
|---------------|------------------------------------|
| ML100         | $\Delta$ hpt                       |
| ML103         | $\Delta$ hpt $\Delta$ hp4 rbs nifE |
| ML104         | $\Delta$ hpt $\Delta$ hp4          |
| ML111         | ML100 $\Delta$ nifD                |
| ML112         | ML104 and pLIH2                    |
| ML113         | ML104 and pLIH2hp4                 |
| ML114         | ML103 and pLIH2                    |
| ML115         | ML100 and pLIH2                    |
| ML200         | ML100 $\Delta$ hp1-ferredoxin      |



## Plasmid diagrams and descriptions

pJAL2 contains a thermostable kanamycin nucleotidase, *kat*, expressed from the *M. jannaschii* *rpoH* promoter and the FS406 *hpt* gene driven by the *M. jannaschii* *mtrE* promoter.

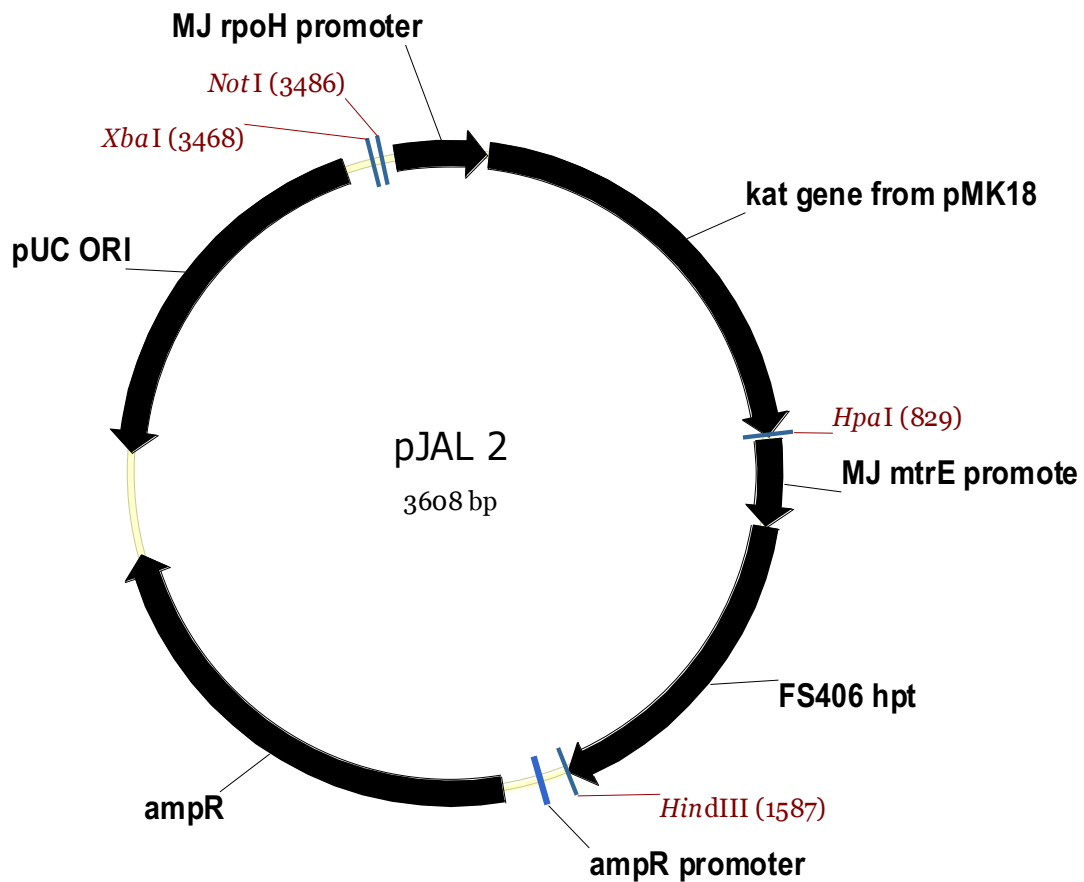

pJALV3S1 also contains the thermostable *kat* and FS406 *hpt* genes but they are driven by the *M. jannaschii* *mtrE* and *mcrB* promoters respectively

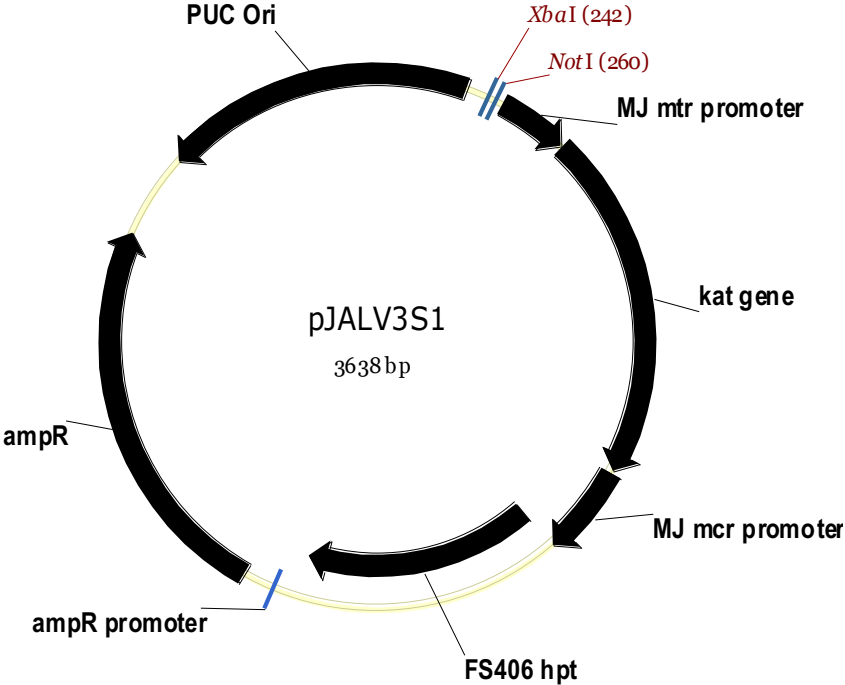

pLKH contains the high temperature-evolved *kat* gene *cohtk* driven by the *M. jannaschii mtrE* promoter and the FS406 *hpt* gene driven by the *M. jannaschii mcrB* promoter.

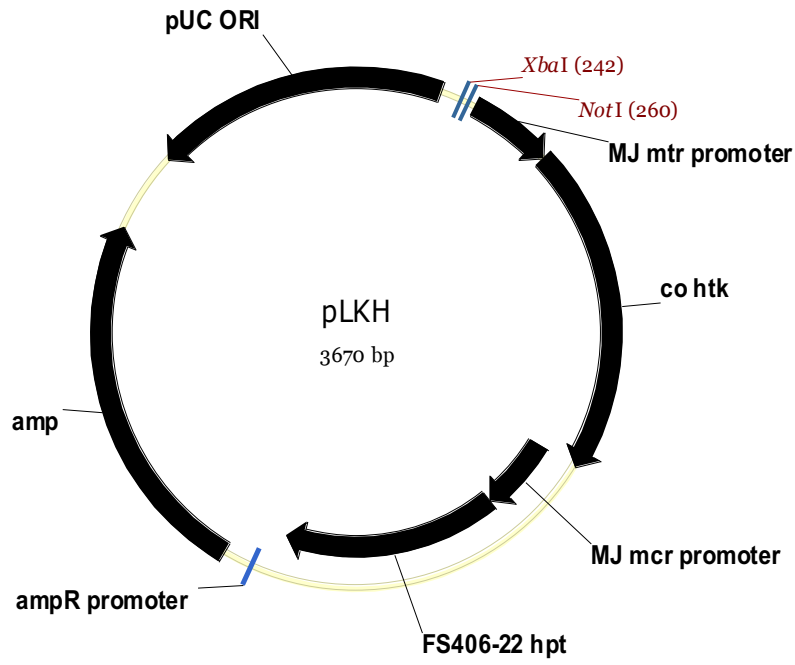

pLHH contains the *M.jannaschii* HMG CoA reductase gene driven by the strong *M.jannaschii* *mtrE* promoter

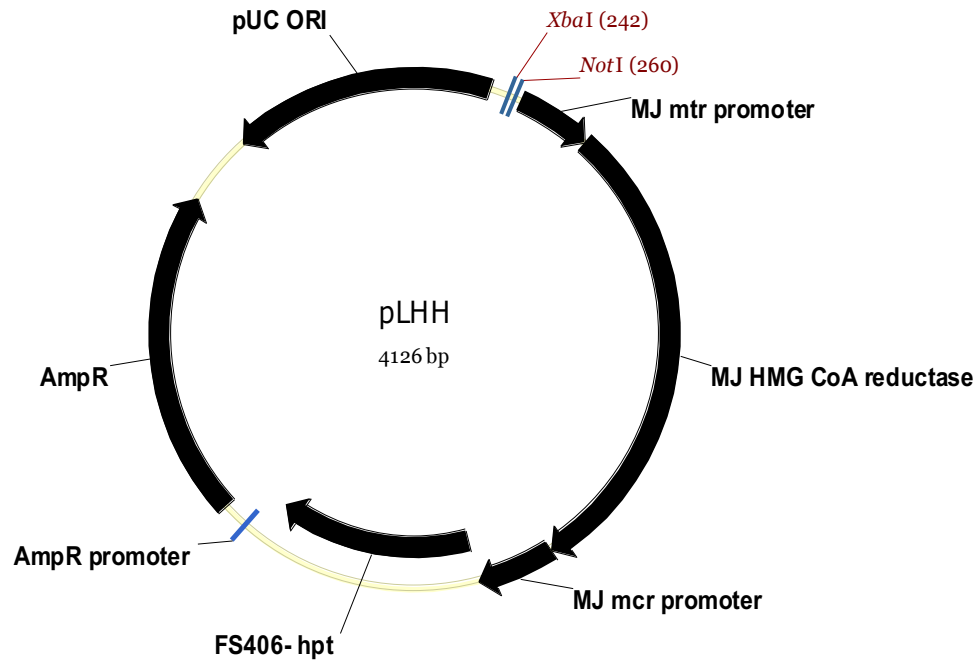

pLIH2 is an integration vector with the *M. jannaschii* HMG CoA reductase gene used for simvastatin selection. It also has about 500 bp of the intergenic region downstream of the FS406 *nrpR* gene for homologous recombination.

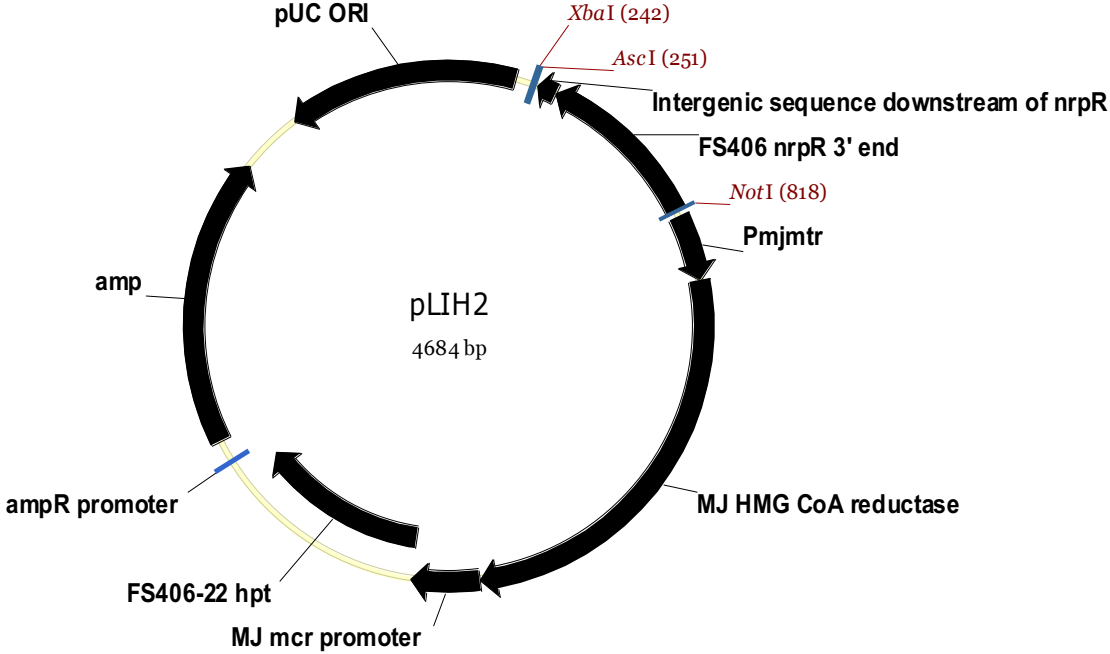

pLIH2hp4 is pLIH2 (above) with the FS406 *hp4* gene including its upstream promoter region.

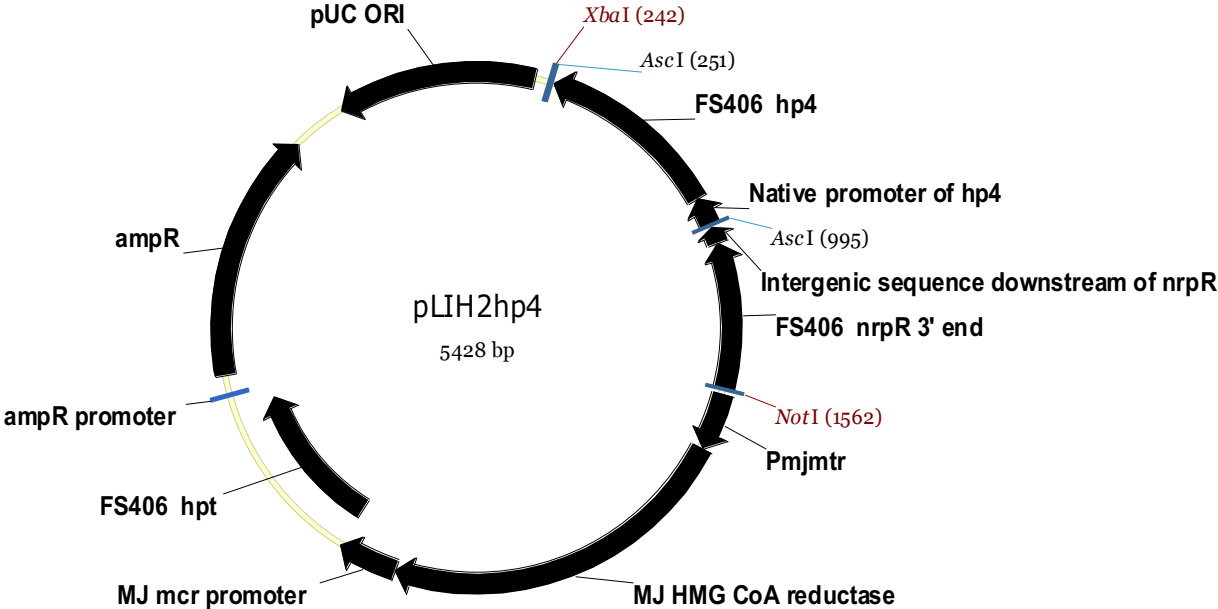

pJAL del nifD contains an in-frame deletion of FS406 *nifD*

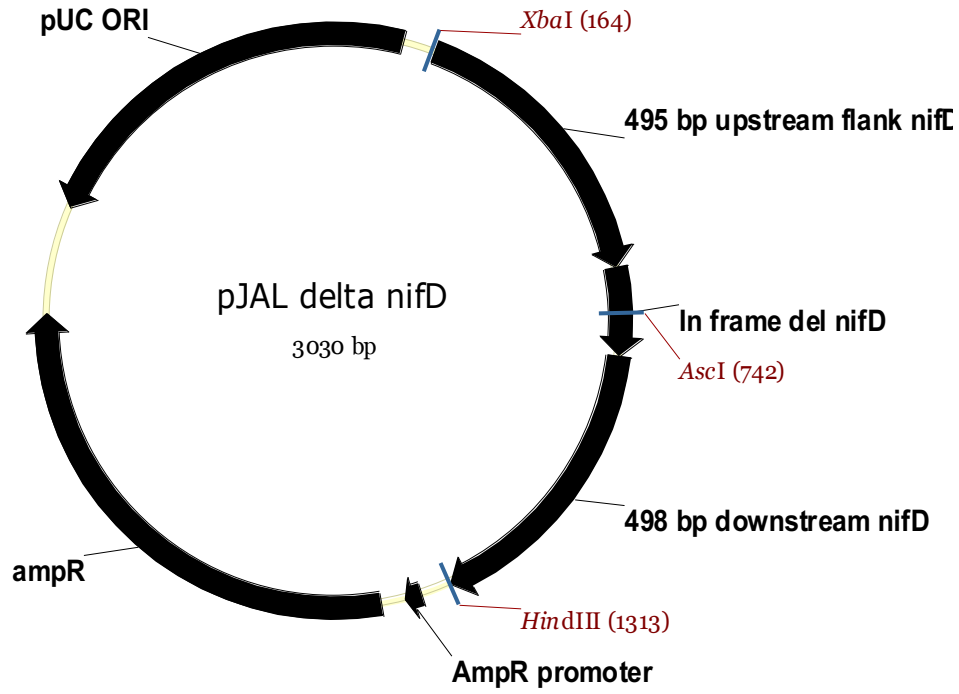

pL delta nifD cohtkhpt contains the high temperature-evolved *kat* gene *cohtk* and the FS406 *hpt* gene cassette inserted into the in-frame deletion of *nifD* at the AscI site.

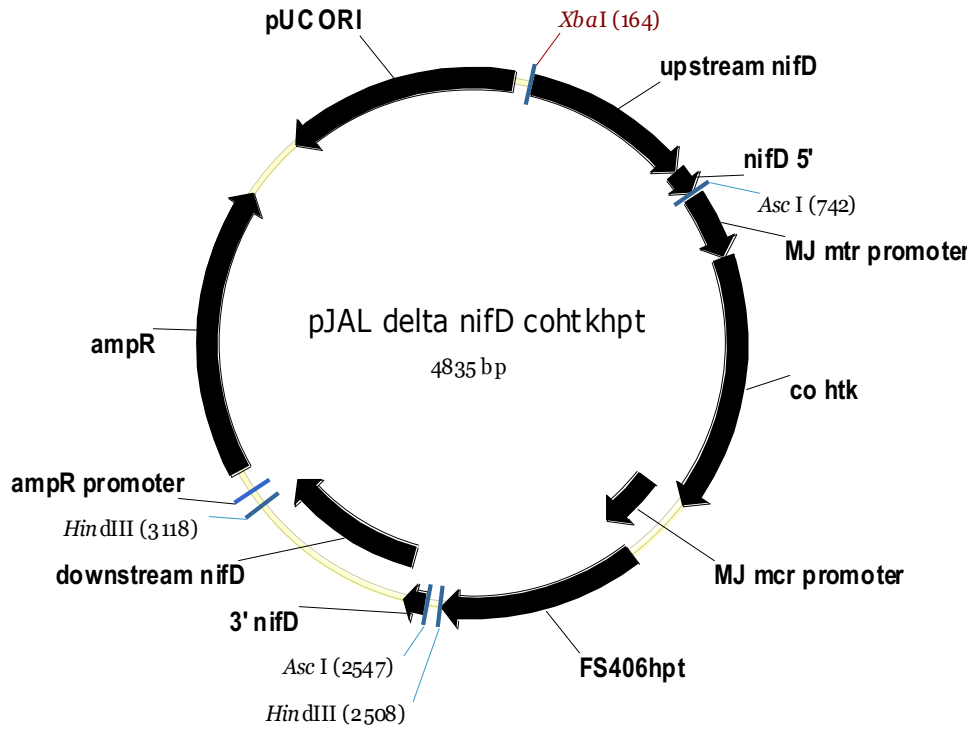

Supplement: spectrum02093-21_supp_1_seq8.pdf [file spectrum02093-21_supp_1_seq8.pdf]
